# Supplementary material for: Mitochondrial Reactive Oxygen Species Contribute to Pathological Inflammation During Influenza A Virus Infection in Mice
Source: PubMed Central journal article supplement (PMC7104903; doi:10.1089/ars.2019.7727), 2020-03-24
Supplement: Supp_Fig1.pdf [file Supp_Fig1.pdf]

## Supplementary Data

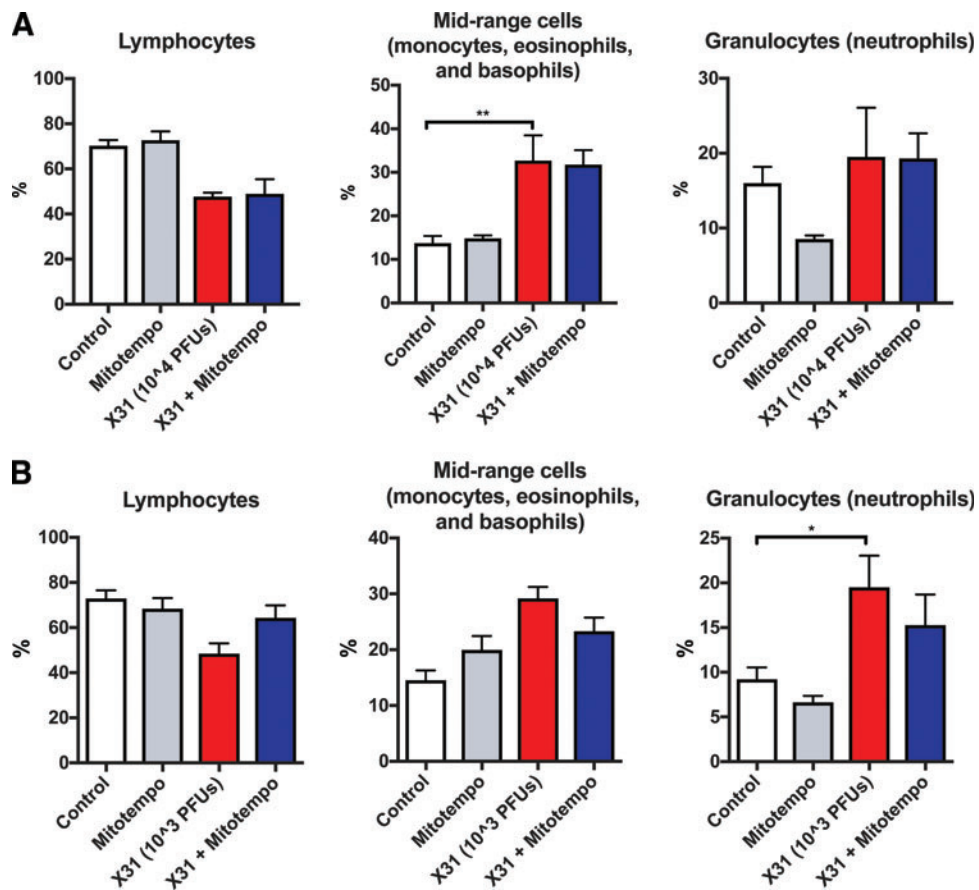

**SUPPLEMENTARY FIG. S1. MitoTEMPO has no effect on systemic inflammation at day 3 (A) or day 5 (B) postinfluenza infection.** Mice were treated once daily via intranasal administration of MitoTEMPO (100  $\mu$ g) over a 4–6-day period 1 day before virus infections. Mice were intranasally infected with X31 (10<sup>4</sup> PFUs in **A** or 10<sup>3</sup> PFUs in **B**) or PBS control. Measurements of lymphocytes, granulocytes, and midrange cells (monocytes, eosinophils, and basophils) were recorded in whole blood using the CELL-DYN Emerald 22 Hematology Analyzer (Control,  $n = 8$ ; MitoTEMPO,  $n = 8$ ; X31  $n = 16$  X31+mito  $n = 16$ ). Statistical analysis was conducted using one-way ANOVA test followed by Tukey's *post hoc* test for multiple comparisons. Statistical significance was taken where \* $p < 0.05$  and \*\* $p < 0.01$ . PBS, phosphate-buffered saline; PFU, plaque forming unit.
