# Supplementary material for: Mitochondrial Reactive Oxygen Species Contribute to Pathological Inflammation During Influenza A Virus Infection in Mice
Source: PubMed Central journal article supplement (PMC7104903; doi:10.1089/ars.2019.7727), 2020-03-24
Supplement: Supp_Fig2.pdf [file Supp_Fig2.pdf]

**PDB ( $10^{-6}$ M) stimulated superoxide**

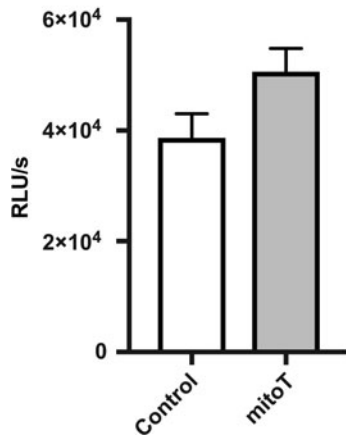

**SUPPLEMENTARY FIG. S2. MitoTEMPO has no effect on NOX2 oxidase activity in isolated macrophages.** The NOX2 oxidative burst was measured by L-012-enhanced chemiluminescence in the macrophage cell line RAW 264.7 cells pretreated with MitoTEMPO (5 mM) for 1 h. RLU/s are represented as mean  $\pm$  SEM of  $n=9$  experiments. RLU, relative light units; SEM, standard error of the mean.
