# Supplementary material for: Mitochondrial Reactive Oxygen Species Contribute to Pathological Inflammation During Influenza A Virus Infection in Mice
Source: PubMed Central journal article supplement (PMC7104903; doi:10.1089/ars.2019.7727), 2020-03-24
Supplement: Supp_Fig3.pdf [file Supp_Fig3.pdf]

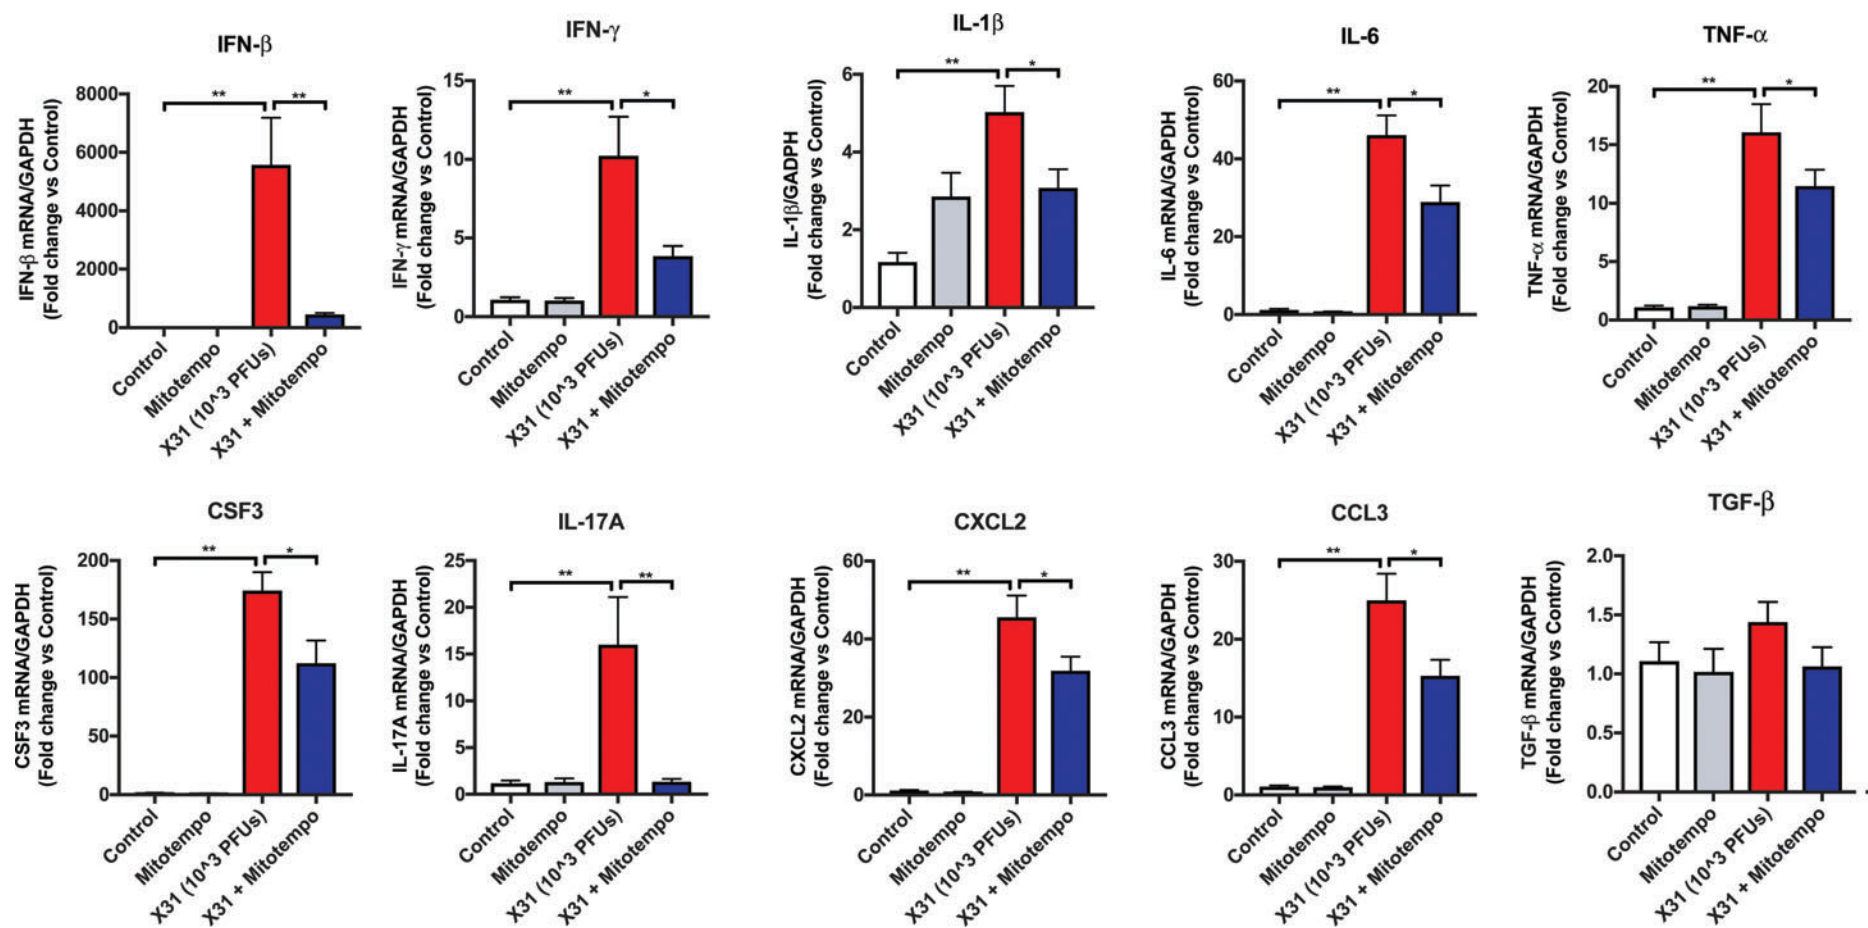

**SUPPLEMENTARY FIG. S3. Marked suppression of proinflammatory and antiviral cytokine expression with MitoTEMPO treatment at day 5 postinfection.** Mice were infected with Hkx-31 at ( $10^3$  PFUs) or PBS (control) *via* intranasal administration. Animals were treated once daily *via* intranasal administration of MitoTEMPO (100  $\mu$ g) over a 6-day period 1 day before virus infection for measurements at day 5 p.i. qPCR was used to quantify expression of cytokines and chemokines: IFN- $\beta$ , IFN- $\gamma$ , IL-1 $\beta$ , IL-6, TNF- $\alpha$ , IL-17A, CXCL2, and CCL3. Responses are relative to GAPDH and then expressed as a fold-change above naive controls. Data are expressed as mean  $\pm$  SEM (Control,  $n=6-8$ ; MitoTEMPO,  $n=6-8$ ; X31  $n=10$  X31+mito  $n=12-14$ ). Statistical analysis was conducted using one-way ANOVA test followed by Tukey's *post hoc* test for multiple comparisons. Statistical significance was taken where  $p < 0.05$  (\* $p < 0.05$  and \*\* $p < 0.01$ ). qPCR, quantitative polymerase chain reaction.
