# Supplementary material for: Mitochondrial Reactive Oxygen Species Contribute to Pathological Inflammation During Influenza A Virus Infection in Mice
Source: PubMed Central journal article supplement (PMC7104903; doi:10.1089/ars.2019.7727), 2020-03-24
Supplement: Supp_Fig5.pdf [file Supp_Fig5.pdf]

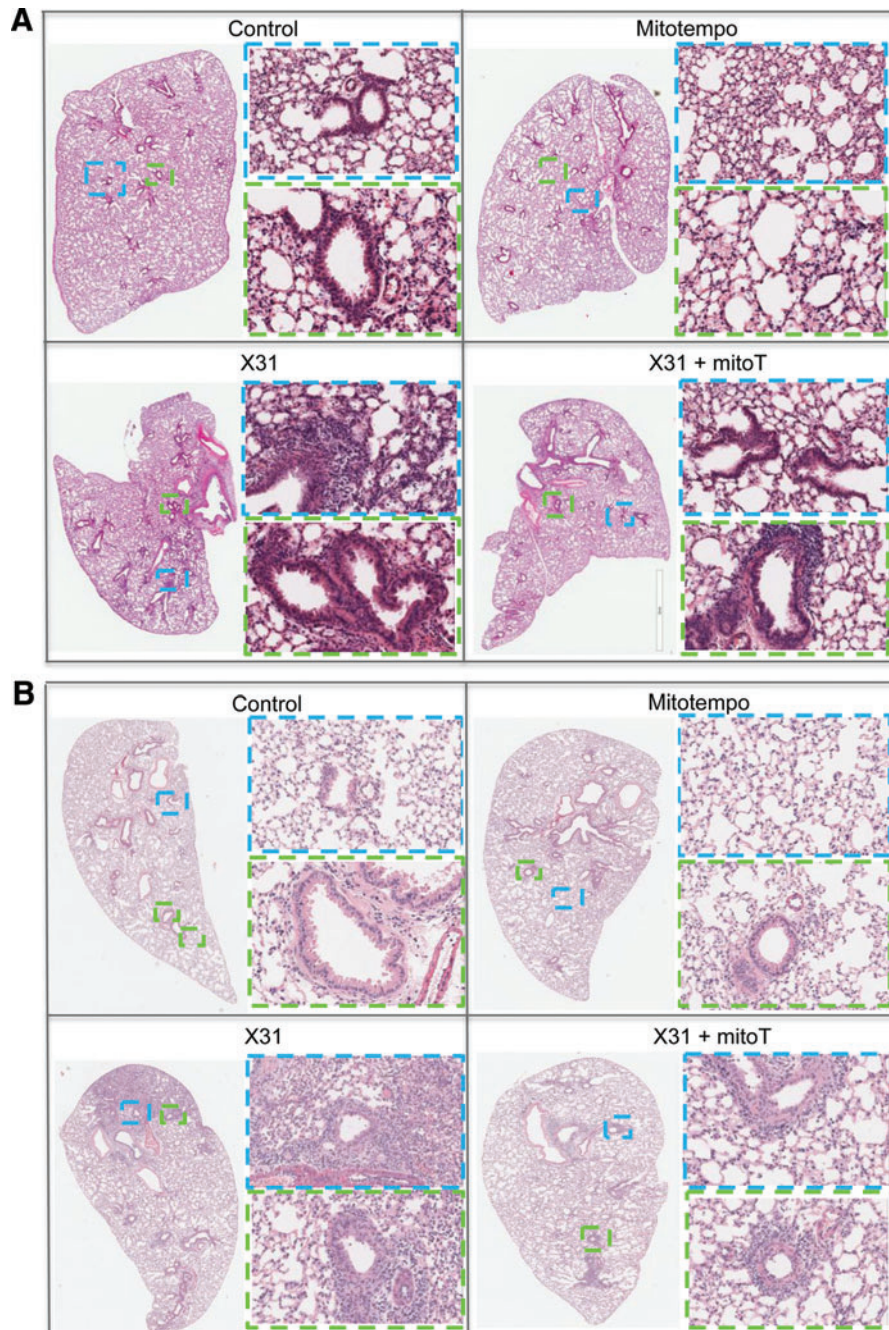

**SUPPLEMENTARY FIG. S5. Lung histopathological changes in Hkx-31-infected mice at day 3 and 5 postinfection.** Histopathological H&E analysis of lungs from WT C57Bl/6J mice treated once daily via intranasal administration of MitoTEMPO (100  $\mu$ g) over a 4–6-day period 1 day before virus infections. Mice were intranasally infected with X31 ( $10^3$ – $10^4$  PFUs) or PBS (control) and culled for assessment at (A) day 3 p.i or (B) day 5 p.i. Representative images are at three different magnifications (1 $\times$ [clear], 10 $\times$ [blue], 20 $\times$ [green]). Data are expressed as mean  $\pm$  SEM (Control,  $n=6$ –8; MitoTEMPO,  $n=6$ –8; X31  $n=10$  X31+mito  $n=12$ –14).
