# Supplementary material for: Mitochondrial Reactive Oxygen Species Contribute to Pathological Inflammation During Influenza A Virus Infection in Mice
Source: PubMed Central journal article supplement (PMC7104903; doi:10.1089/ars.2019.7727), 2020-03-24
Supplement: Supp_Fig6.pdf [file Supp_Fig6.pdf]

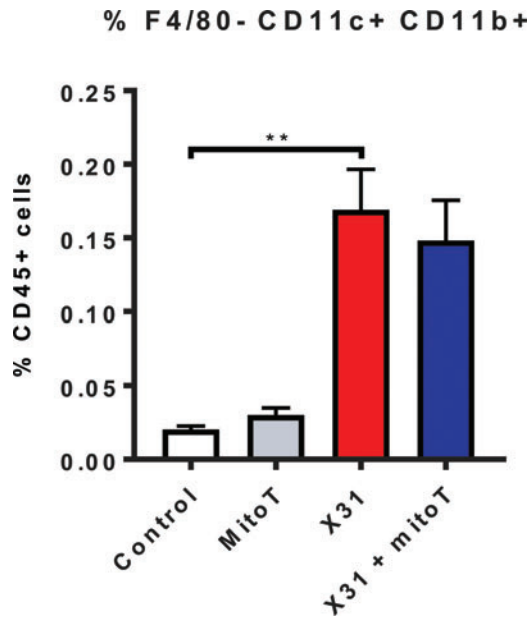

**SUPPLEMENTARY FIG. S6.** While IAV increased the number of splenic dendritic cells, MitoTEMPO treatment did not alter this dendritic cell population in the spleen. C57Bl/6J mice were treated once daily via intranasal administration of MitoTEMPO (100  $\mu$ g) over a 6-day period 1 day before virus infections. Mice were intranasally infected with X31 ( $10^4$  PFUs) or PBS control. Single cells were isolated from spleen and multidimensional flow cytometry was used to quantify the relative abundance of myeloid DCs. DCs were measured as CD11b<sup>+</sup> CD11c<sup>+</sup> cells gated from the F4/80 negative population. Data was expressed as mean  $\pm$  SEM (Control,  $n=8$ ; MitoTEMPO,  $n=8$ ; X31  $n=12$  X31+mito  $n=12$ ). Statistical analysis was conducted using one-way ANOVA test followed by Tukey's *post hoc* test for multiple comparisons. Statistical significance was taken where  $p < 0.05$  (\*\* $p < 0.01$ ). DCs, dendritic cells; IAV, influenza A virus.
