# Supplementary material for: Mitochondrial Reactive Oxygen Species Contribute to Pathological Inflammation During Influenza A Virus Infection in Mice
Source: PubMed Central journal article supplement (PMC7104903; doi:10.1089/ars.2019.7727), 2020-03-24
Supplement: Supp_Fig7.pdf [file Supp_Fig7.pdf]

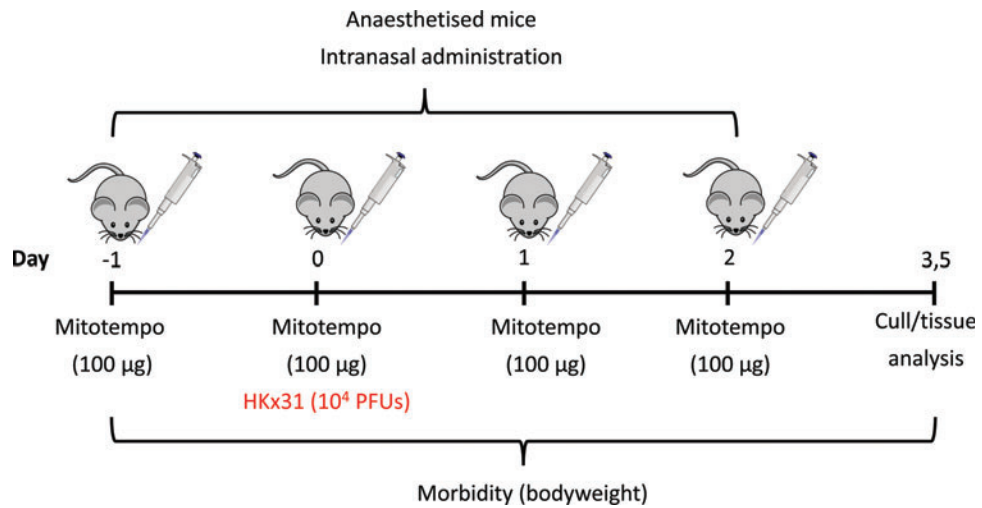

**SUPPLEMENTARY FIG. S7. Treatment strategy.** Anesthetized mice were treated once daily *via* intranasal delivery with either PBS (control) or MitoTEMPO (100 µg) 1 day before infection with Hk-x31 ( $10^3$  or  $10^4$  PFUs) and every day thereafter for 4 days and culled for endpoint analyses at day 3 and 5 postinfection.
